# Supplementary material for: A 2-year intercomparison of three methods for measuring black carbon concentration at a high-altitude research station in Europe
Source: Copernicus journal article supplement (doi:10.5194/amt-17-3897-2024), 2024-07-03
Supplement: Supplementary file 1 [file amt-17-3897-2024-supplement.pdf]

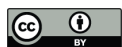

*Supplement of*

## **A 2-year intercomparison of three methods for measuring black carbon concentration at a high-altitude research station in Europe**

**Sarah Tinorua et al.**

*Correspondence to:* Sarah Tinorua ([sarah.tinorua@psi.ch](mailto:sarah.tinorua@psi.ch)) and Cyrielle Denjean ([cyrielle.denjean@meteo.fr](mailto:cyrielle.denjean@meteo.fr))

The copyright of individual parts of the supplement might differ from the article licence.

*Supplement*

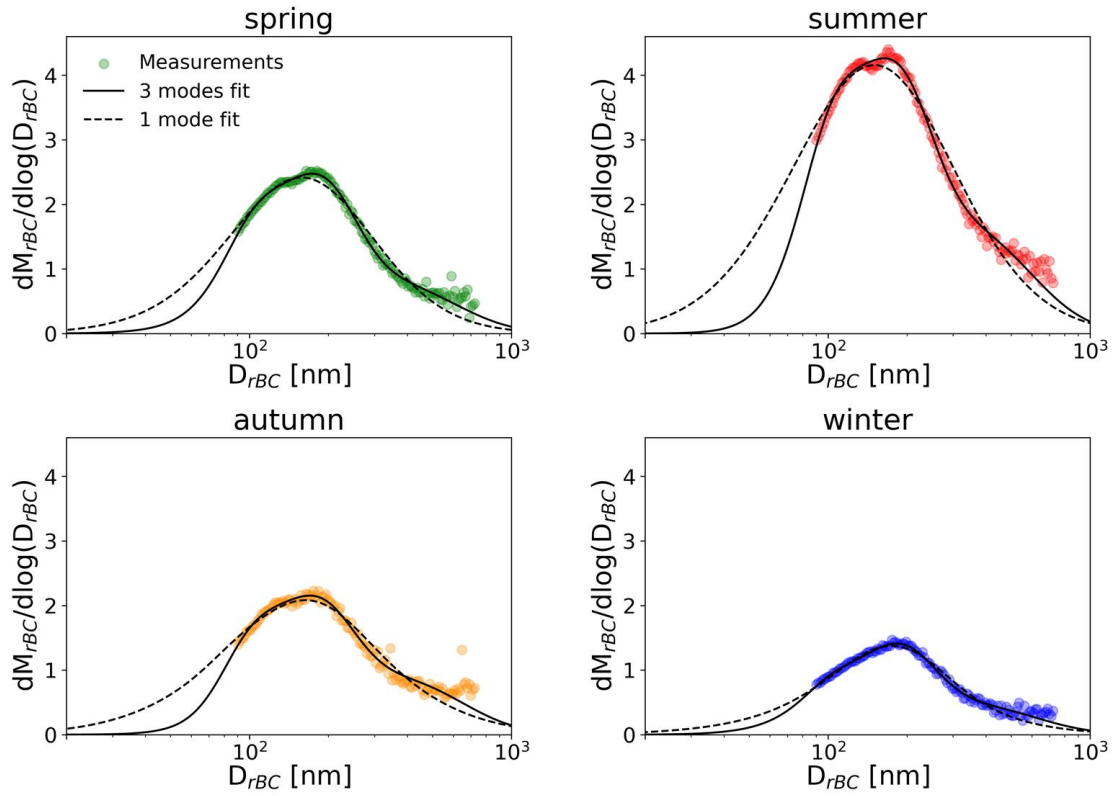

*Figure S1: rBC size distribution measured in colored dots and fitted with one (dashed black line) or three (solid black line) lognormal modes for 2019 and 2020 at the PDM grouped by seasons.*

|                                                                                            |                                     | Winter (DJF)       | Spring (MAM)       | Summer (JJA)       | Autumn (SON)       | All data           |
|--------------------------------------------------------------------------------------------|-------------------------------------|--------------------|--------------------|--------------------|--------------------|--------------------|
| <b>Mass conc. all data [ng.m<sup>-3</sup>]</b>                                             | <b>rBC,corr</b> median (25th, 75th) | 5.59 (2.12,12.0)   | 17.9 (8.42, 43.3)  | 55.3 (24.6 85.5)   | 16.9 (4.61 156.1)  | 21.2 (6.54, 62.0)  |
|                                                                                            | <b>rBC,corr</b> mean (stand. dev.)  | 17.7 (42.0)        | 31.6 (34.7)        | 61.4 (48.8)        | 33.5 (39.4)        | 39.4 (45.7)        |
|                                                                                            | <b>EC</b> median (25th, 75th)       | 41.0 (36.0, 47.0)  | 48.0 (42.0, 66.0)  | 59.0 (54.0, 88.0)  | 46.0 (39.0, 62.0)  | 47.0 (38.0, 63.3)  |
|                                                                                            | <b>EC</b> mean (stand. dev.)        | 40.1 (12.4)        | 49.6 (25.0)        | 72.6 (34.0)        | 48.2 (13.7)        | 52.6 (26.0)        |
|                                                                                            | <b>eBC</b> median (25th, 75th)      | 20.7 (12.1, 48.3)  | 73.4 (31.4, 151)   | 124 (37.9, 201)    | 18.1 (10.4, 46.2)  | 39.0 (16.0, 130)   |
|                                                                                            | <b>eBC</b> mean (stand. dev.)       | 47.4 (63.4)        | 98.4 (78.8)        | 127 (89.2)         | 42.6 (55.6)        | 78.5 (81.7)        |
| <b>Mass conc. (only include data when pairs values are available) [ng.m<sup>-3</sup>]*</b> | <b>rBC,corr</b> median (25th, 75th) | 11.4 (8.21,18.1)   | 32.3 (14.8, 46.3)  | 59.1 (37.7,66.6)   | 22.6 (8.21,55.2)   | 28.6 (14.1,55.5)   |
|                                                                                            | <b>rBC,corr</b> mean (stand. dev.)  | <b>17.1</b> (16.7) | <b>34.4</b> (23.8) | <b>57.4</b> (24.9) | <b>35.2</b> (31.1) | <b>36.4</b> (28.4) |
|                                                                                            | <b>EC</b> median (25th, 75th)       | 41.0 (37.0 , 47.0) | 50.0 (42.0, 66.0)  | 59.0 (54.0 ,89.5)  | 45.5 (38.8, 62.3)  | 47.0 (39.0, 65.0)  |
|                                                                                            | <b>EC</b> mean (stand. dev.)        | <b>42.2</b> (9.18) | <b>54.5</b> (22.6) | <b>73.5</b> (35.3) | <b>47.7</b> (14.0) | <b>54.7</b> (25.3) |
|                                                                                            | <b>eBC</b> median (25th, 75th)      | 29.4 (21.8, 35.8)  | 66.1 (46.2, 84.3)  | 129 (104, 167)     | 57.5 (29.3, 105)   | 65.5 (32.8, 118)   |
|                                                                                            | <b>eBC</b> mean (stand. dev.)       | <b>30.7</b> (12.2) | <b>69.7</b> (31.8) | <b>138</b> (48.3)  | <b>70.9</b> (47.4) | <b>78.5</b> (54.3) |

**Table S1. Corrected rBC, EC and eBC mean and median mass concentrations grouped by season and over the campaign. Standard deviations and 25<sup>th</sup> and 75<sup>th</sup> percentiles are given in parenthesis.**

**\*Statistics are given for pairwise data (i. e. data when all variables were available) in order to compare the results of the different measurement methods.**

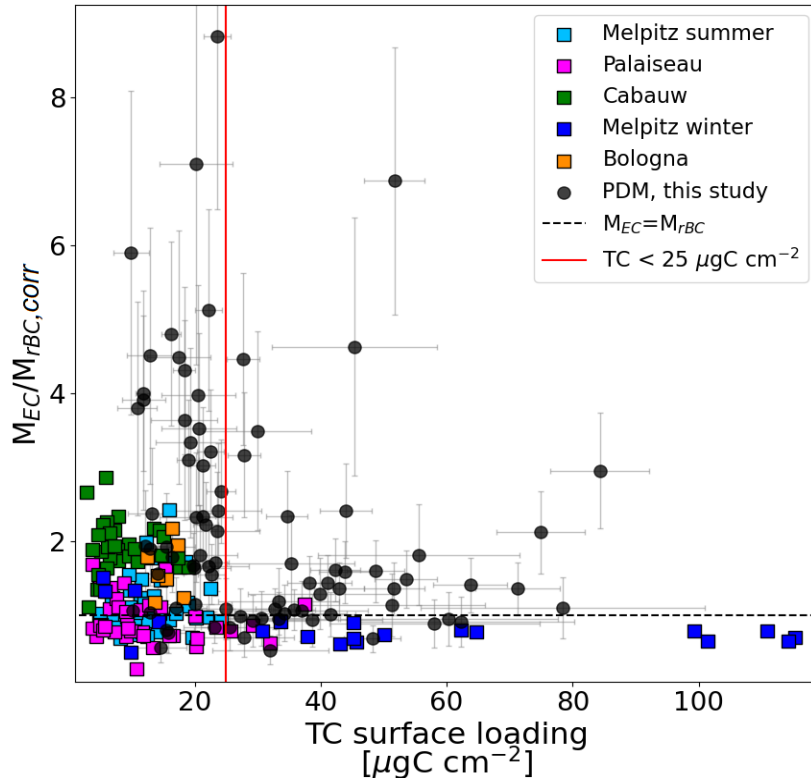

Figure S2:  $M_{EC}/M_{rBC,corr}$  ratios as a function of the TC surface loading on the filter. The red line corresponds to a TC surface loading of  $25 \mu\text{gC cm}^{-2}$ , which is the threshold below which  $M_{EC}$  values were invalidated. The colored points are from Pileci et al. (2021) and the black dots are the PDM data.

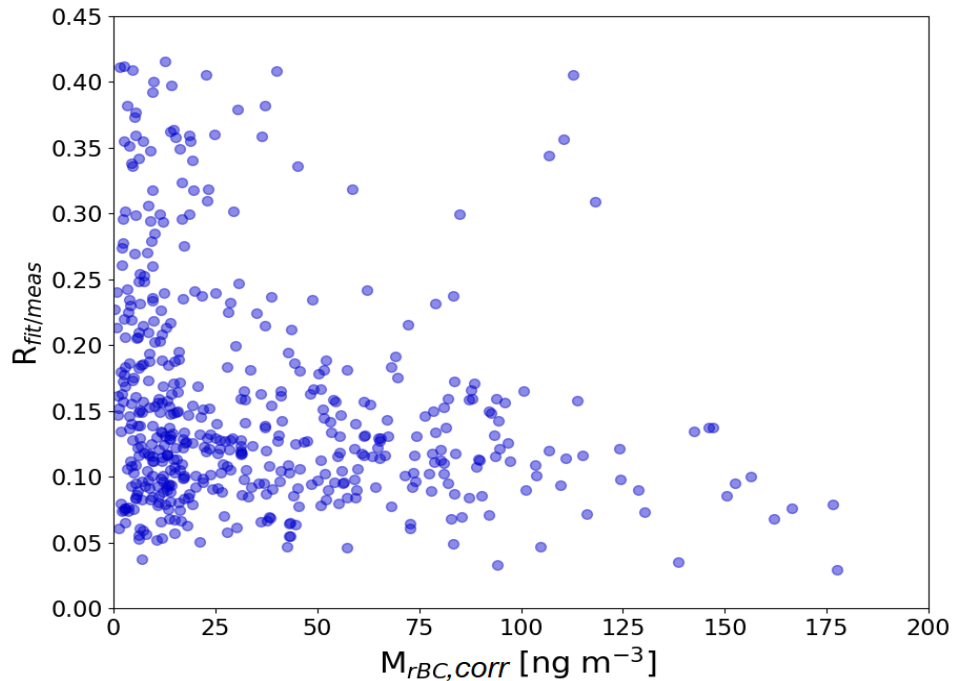

Figure S3:  $R_{fit/meas}$  as a function of  $M_{rBC,corr}$ . Data are in a 1-day time resolution.
